# Supplementary material for: A series of viologen complexes containing thiophene and Br− dual fluorescent chromophores for continuous visual sensing of pH and Hg2+
Source: Royal Society of Chemistry journal article supplement (doi:10.1039/d3dt03415a), 2024-01-01
Supplement: d3dt03415a1.pdf [file d3dt03415a1.pdf]

## Supporting Information

For

### **A series of viologen complexes containing thiophene and Br- dual fluorescent chromophores for continuous visual sensing of pH and Hg<sup>2+</sup>**

*College of Chemistry and Materials Engineering, Bohai University, Jinzhou 121013,  
P. R. China*

*\*Corresponding authors E-mail: [ying@bhu.edu.cn](mailto:ying@bhu.edu.cn), [wangxiuli@bhu.edu.cn](mailto:wangxiuli@bhu.edu.cn)*

### **Experimental section**

#### **Instrumentation**

Powder X-ray diffraction (PXRD) was measured using an Ultima IV X-ray powder diffractometer (Kuraray, Tokyo, Japan) at 40 kV and 40 mA using Cu K $\alpha$  radiation ( $k = 1.5406 \text{ \AA}$ ). Ultraviolet-visible absorption spectra and fluorescence spectra of the as-prepared products were performed by a Shimadzu UV-2600 spectrophotometer and Perkin-Elmer luminescence spectrometer (LS-55). Fourier transform infrared spectroscopy (FTIR) was used to identify the functional groups of the products by a Shimadzu IRAffinity 1S spectrophotometer. X-ray photoelectron spectroscopy (XPS) measurement for elemental component analysis of the production was conducted by an ESCALAB 250Xi X-ray photoelectron spectrometer. The single crystal X-ray was measured on a Bruker APEX-IV CCD diffractometer with graphite monochromatic Mo K $\alpha$  radiation at 298 K, and the structure was solved by direct method and refined with the full matrix least-squares method on  $F^2$  embedded in SHELXTL program through using the Olex2 as the graphical interface. All hydrogen atoms were placed geometrically in ideal positions with a riding model, and all non-

hydrogen atoms were refined by the anisotropic thermal parameters during the final cycles. CCDC 2120700 and 2232465 contains the crystallographic data for this paper.

## Chemicals

$\text{CdCl}_2 \cdot 2\text{H}_2\text{O}$ ,  $\text{CdBr}_2 \cdot 2\text{H}_2\text{O}$ ,  $\text{ZnBr}_2 \cdot 2\text{H}_2\text{O}$  and Bis-1-Thiophen-3-ylmethyl-[4,4']bipyridinyl (Btybipy) were supplied by Macklin Reagent Co., Ltd. Mercury nitrate and other metal salts were all purchased from Kelong Reagent Co., Ltd. All organic reagents were bought from RunZe Reagent Co., Ltd.

## Contents:

**Fig. S1.** FT-IR pattern of complexes **1–3**.

**Fig. S2.** UV-vis spectra of complexes **1–3**: (a) before and after UV irradiation; (b) different solvent.

**Fig. S3.** Time-dependent fluorescence intensity of complex **1** suspension of  $\text{Hg}^{2+}$  aqueous dispersion in PBS buffer solution.

**Fig. S4.** Fluorescence emission spectra of pH values of complexes in PBS buffer solution: (a) complex **1**, (b) complex **2**, (c) complex **3**. The corresponding linear relationship between the fluorescence intensity of complexes and pH values: (d) complex **1**, (e) complex **2**, (f) complex **3**.

**Fig. S5.** Fluorescence emission spectra of complex **1** with various interfering ions in methanol solution: (a) cations, (b) anions. Fluorescence emission spectra of complex **1** with various interfering ions in PBS buffer solution: (c) cations, (d) anions.

**Fig. S6.** Fluorescence emission spectra of pH values of complexes in methanol solution: (a) complex **2**, (c) complex **3**. The corresponding linear relationship between the fluorescence intensity of complexes and pH values: (b) complex **2**, (d) complex **3**.

**Fig. S7.** Changes in fluorescence of complexes **2–3** under cyclic treatment of  $\text{Hg}^{2+}$ .

**Fig. S8.** (a) Fluorescence emission spectra of complex **3** in methanol solution. (b), (c) The

corresponding linear relationship between the fluorescence intensity of  $I/I_0$  and  $\text{Hg}^{2+}$  concentration.

**Fig. S9.** (a) Fluorescence emission spectra of complex **1** in PBS buffer solution. (b) The corresponding linear relationship between the fluorescence intensity of  $I/I_0$  and  $\text{Hg}^{2+}$  concentration.

**Fig. S10.** (a), (d) Fluorescence emission spectra of complexes **2–3** in PBS buffer solution. (b), (c), (e) and (f) The corresponding linear relationship between the fluorescence intensity of  $I/I_0$  and  $\text{Hg}^{2+}$  concentration.

**Fig. S11.** CIE chromaticity diagram of complex **2** in the presence of different concentrations of  $\text{Hg}^{2+}$  from 0 to 400  $\mu\text{M}$ .

**Fig. S12.** CIE chromaticity diagram of complex **3** in the presence of different concentrations of  $\text{Hg}^{2+}$  from 0 to 400  $\mu\text{M}$ .

**Fig. S13.** Photographs of the corresponding color of the system treated with various cations. (a) under natural light and (b) 365 nm UV light.

**Fig. S14.** (a) Comparison of the ratiometric emission intensity  $I/I_0$  for complex **2** treated with various cations. (1 mM) (b) Anti-interference experiment of complex **2** (100  $\mu\text{M}$   $\text{Hg}^{2+}$ ).

**Fig. S15.** (a) Comparison of the ratiometric emission intensity  $I/I_0$  for complex **3** treated with various cations. (1 mM) (b) Anti-interference experiment of complex **3** (100  $\mu\text{M}$   $\text{Hg}^{2+}$ ).

**Fig. S16.** XPS survey spectra of complex **2** before and after treatment by  $\text{Hg}^{2+}$ .

**Table S1.** Crystal data and structure refinement for complexes **1–2**.

**Table S2.** Bond lengths [ $\text{\AA}$ ] and angles [ $^\circ$ ] for complexes **1–2**.

**Table S3.** Comparison of the  $\text{Hg}^{2+}$  detection properties of complexes with others methods reported in previous literature.

**Table S4.** Determination of  $\text{Hg}^{2+}$  in real water samples by complex **2**.

**Table S5.** Determination of  $\text{Hg}^{2+}$  in real water samples by complex **3**.

## References

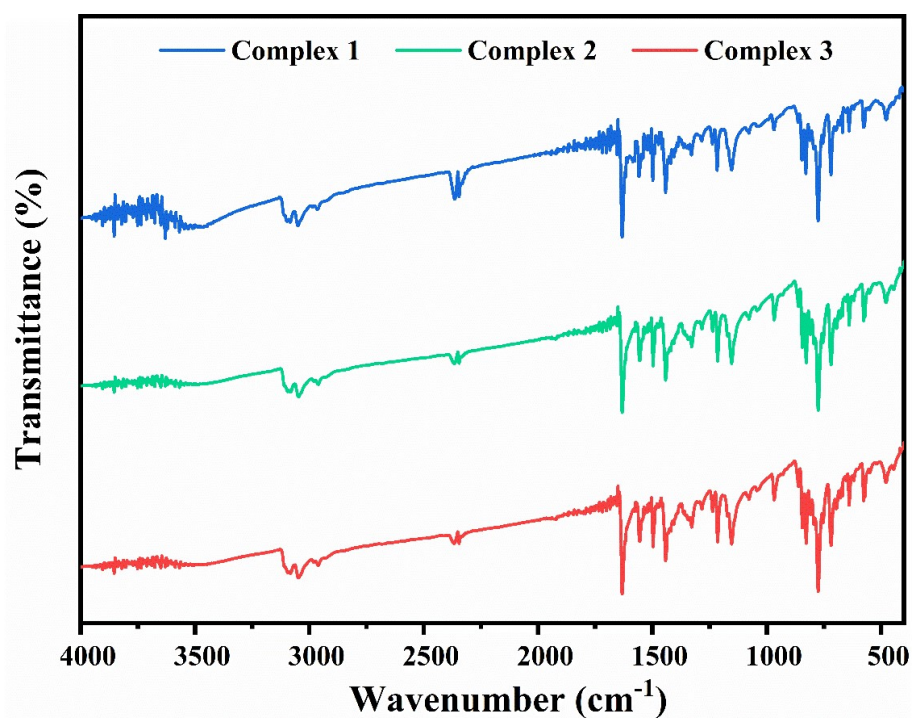

Fig. S1 FT-IR pattern of complexes 1–3.

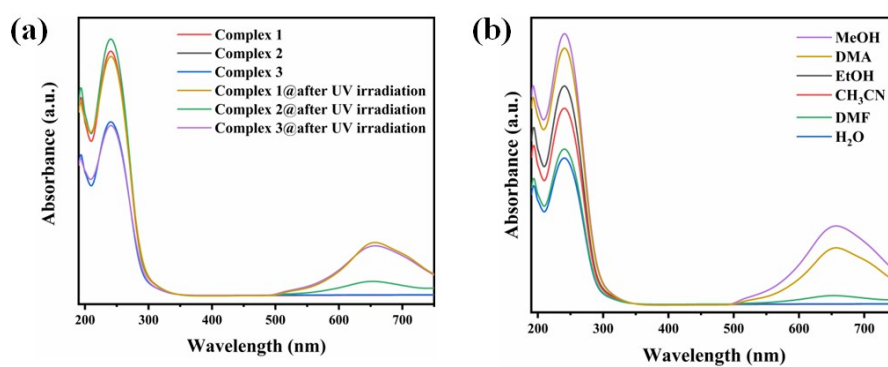

Fig. S2. UV-vis spectra of complexes 1–3: (a) before and after UV irradiation; (b) different solvent.

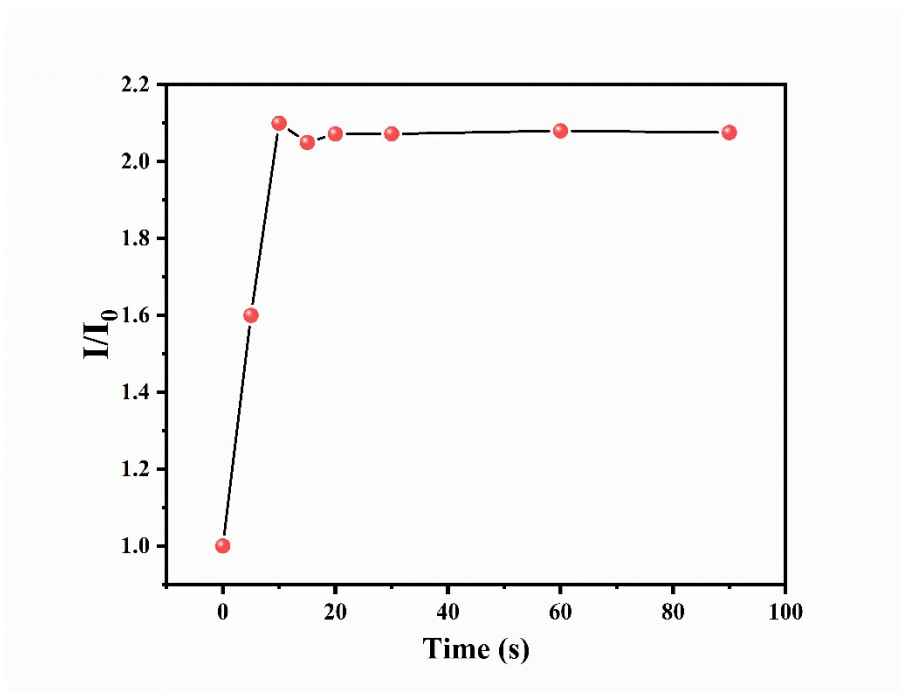

**Fig. S3** Time-dependent fluorescence intensity of complex **1** suspension of  $\text{Hg}^{2+}$  aqueous dispersion in PBS buffer solution.

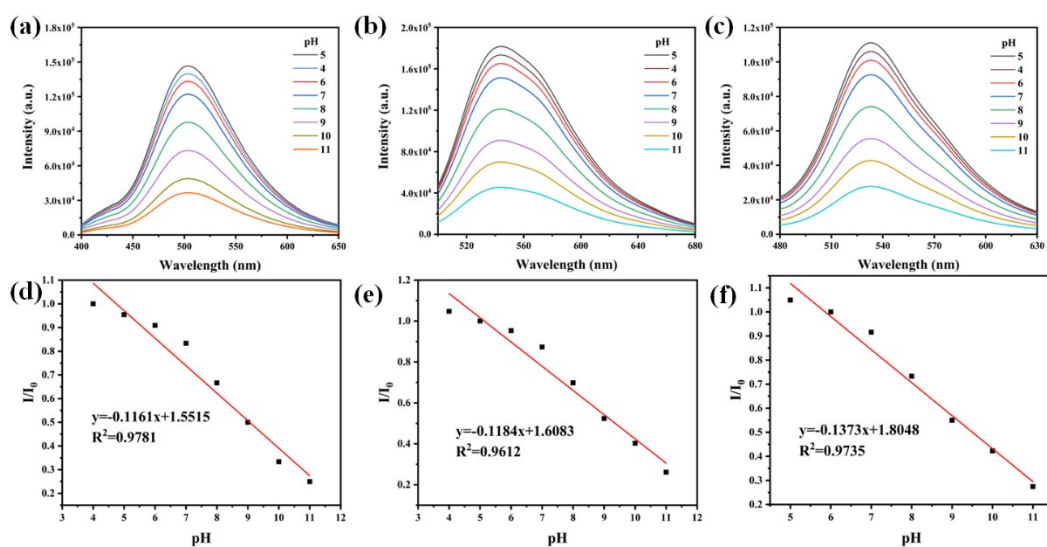

**Fig. S4** Fluorescence emission spectra of pH values of complexes in PBS buffer solution: (a) complex **1**, (b) complex **2**, (c) complex **3**. The corresponding linear relationship between the fluorescence intensity of complexes and pH values: (d) complex **1**, (e) complex **2**, (f) complex **3**.

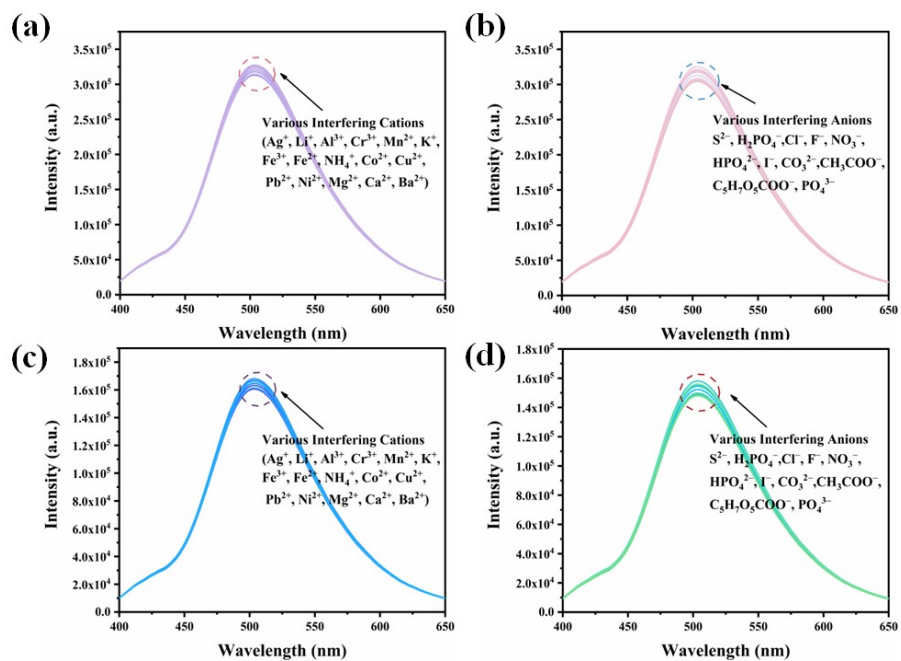

**Fig. S5** Fluorescence emission spectra of complex 1 with various interfering ions in methanol solution: (a) cations, (b) anions. Fluorescence emission spectra of complex 1 with various interfering ions in PBS buffer solution: (c) cations, (d) anions.

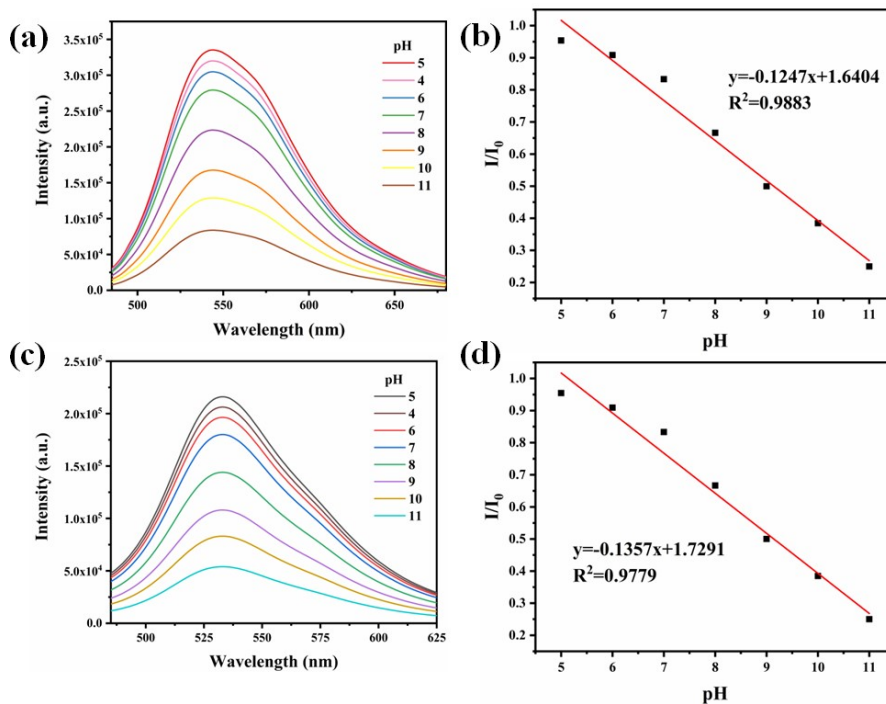

**Fig. S6** Fluorescence emission spectra of pH values of complexes in methanol solution. (a) complex 2, (c) complex 3. The corresponding linear relationship between the fluorescence intensity of complexes and pH values. (b) complex 2, (d) complex 3.

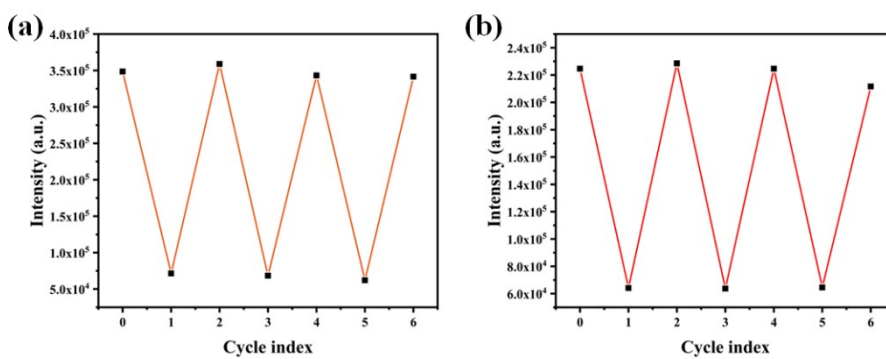

**Fig. S7** Changes in fluorescence of complexes 2–3 under cyclic treatment of Hg<sup>2+</sup>.



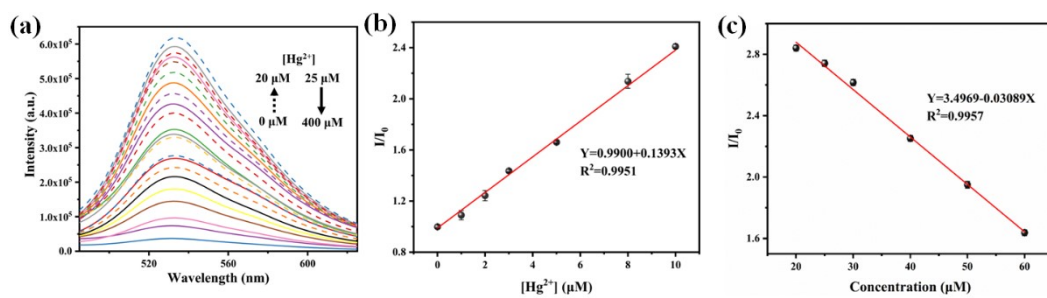

**Fig. S8** (a) Fluorescence emission spectra of complex **3** in methanol solution. (b), (c) The corresponding linear relationship between the fluorescence intensity of  $I/I_0$  and  $Hg^{2+}$  concentration.

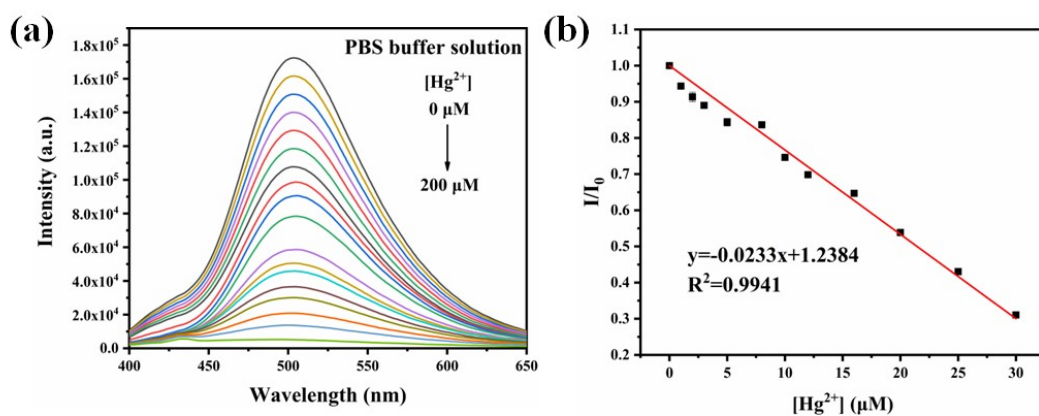

**Fig. S9** (a) Fluorescence emission spectra of complex **1** in PBS buffer solution. (b) The corresponding linear relationship between the fluorescence intensity of  $I/I_0$  and  $Hg^{2+}$  concentration.

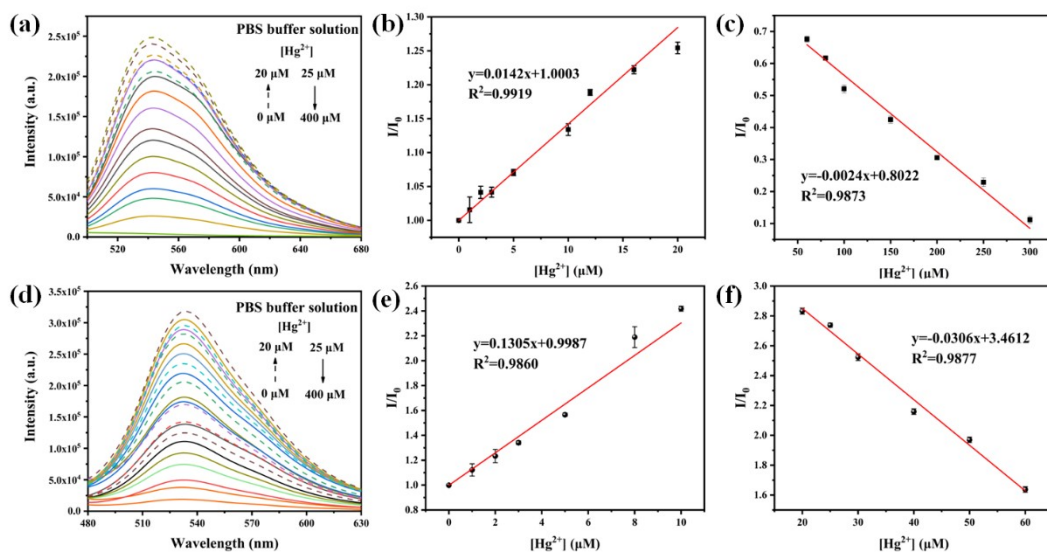

**Fig. S10** (a), (d) Fluorescence emission spectra of complexes **2–3** in PBS buffer solution. (b), (c), (e) and (f) The corresponding linear relationship between the fluorescence intensity of  $I/I_0$  and  $\text{Hg}^{2+}$  concentration.

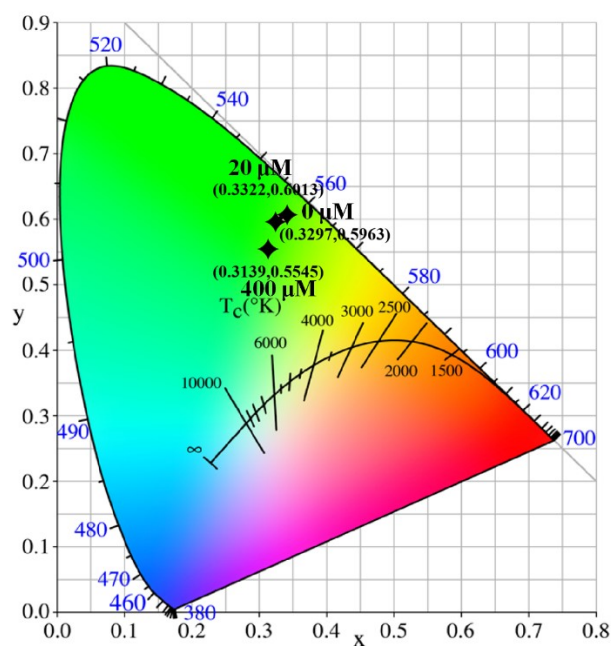

**Fig. S11** CIE chromaticity diagram of complex **2** in the presence of different concentrations of  $\text{Hg}^{2+}$  from 0 to 400  $\mu\text{M}$ .

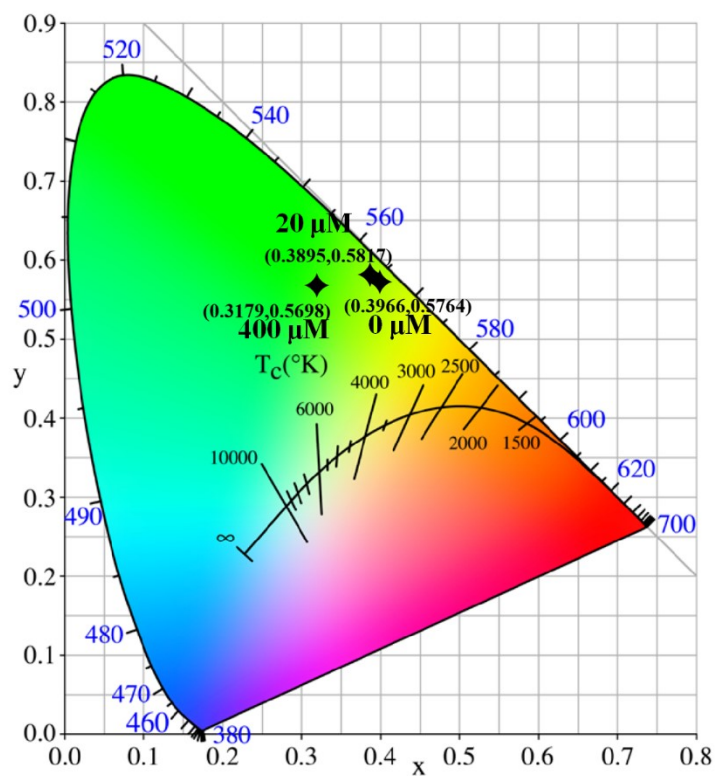

**Fig. S12** CIE chromaticity diagram of complex **3** in the presence of different concentrations of  $\text{Hg}^{2+}$  from 0 to 400  $\mu\text{M}$ .

**(a)**

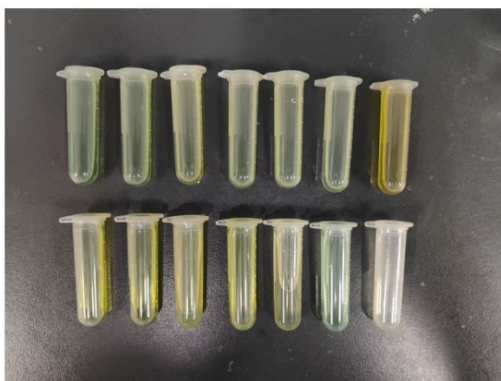

**(b)**

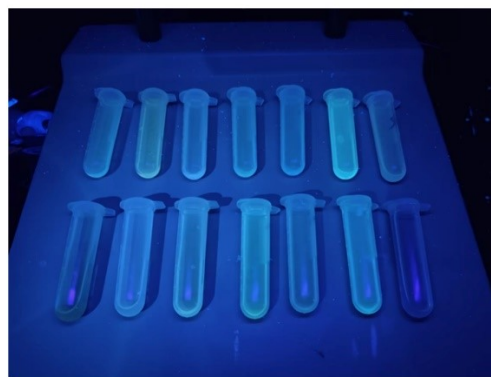

**Fig. S13** Photographs of the corresponding color of complex **1** system treated with various cations.

**(a)** under natural light and **(b)** 365 nm UV light.

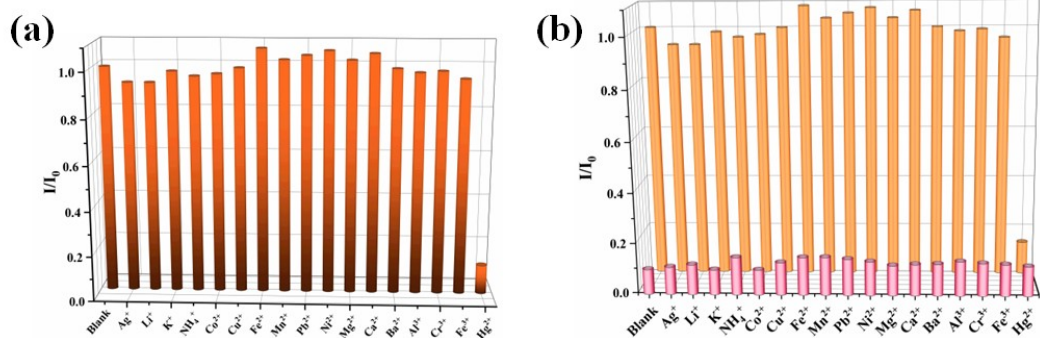

**Fig. S14** (a) Comparison of the ratiometric emission intensity  $I/I_0$  for complex **2** treated with various ions (1 mM). (b) Anti-interference experiment of complex **2** (100  $\mu\text{M}$   $\text{Hg}^{2+}$ ).

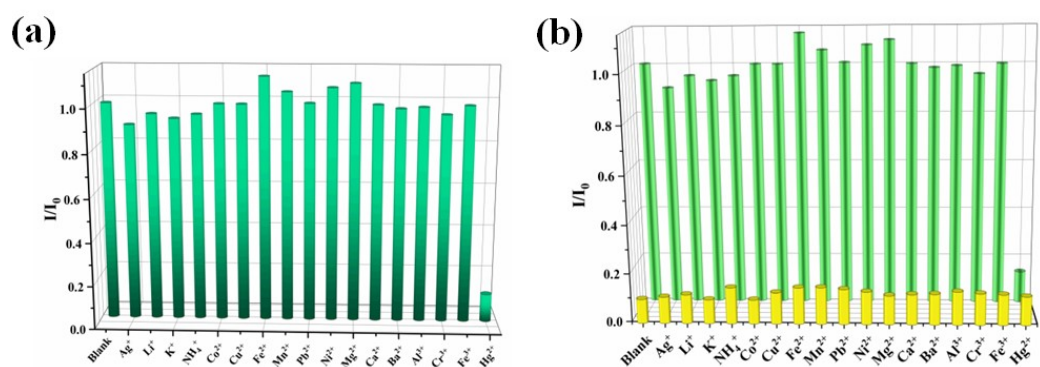

**Fig. S15** (a) Comparison of the ratiometric emission intensity  $I/I_0$  for complex **3** treated with various ions (1 mM). (b) Anti-interference experiment of complex **3** (100  $\mu\text{M}$   $\text{Hg}^{2+}$ ).

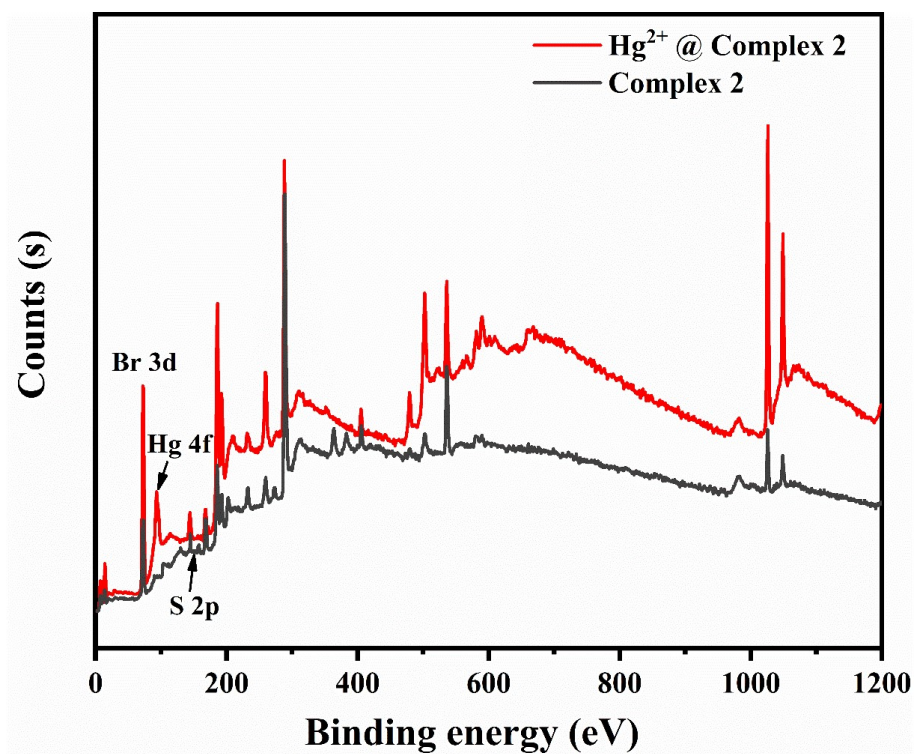

Fig. S16 XPS survey spectra of complex 2 before and after treatment by  $\text{Hg}^{2+}$ .

Table S1 Crystal data and structure refinement for complexes 1–2.

|                   | 1                                                             | 2                                                             |
|-------------------|---------------------------------------------------------------|---------------------------------------------------------------|
| Empirical formula | $\text{C}_{20}\text{H}_{18}\text{CdCl}_4\text{N}_2\text{S}_2$ | $\text{C}_{20}\text{H}_{18}\text{ZnBr}_4\text{N}_2\text{S}_2$ |
| Formula weight    | 604.69                                                        | 735.47                                                        |
| Crystal system    | orthorhombic                                                  | orthorhombic                                                  |
| Space group       | $\text{P}2_12_12_1$                                           | $\text{P}2_12_12_1$                                           |
| $a/\text{\AA}$    | 8.7427(4)                                                     | 8.6729(4)                                                     |
| $b/\text{\AA}$    | 15.4914(7)                                                    | 16.0066(8)                                                    |
| $c/\text{\AA}$    | 17.1013(7)                                                    | 17.1150(8)                                                    |
| $\alpha/^\circ$   | 90                                                            | 90                                                            |
| $\beta/^\circ$    | 90                                                            | 90                                                            |
| $\gamma/^\circ$   | 90                                                            | 90                                                            |

|                                         |             |           |
|-----------------------------------------|-------------|-----------|
| Volume/Å <sup>3</sup>                   | 2316.14(18) | 2376.0(2) |
| Z                                       | 4           | 4         |
| D <sub>c</sub> (g×cm <sup>-3</sup> )    | 1.734       | 2.056     |
| μ/mm <sup>-1</sup>                      | 1.595       | 7.947     |
| F(000)                                  | 1200.0      | 1416.0    |
| R <sub>1</sub> <sup>a</sup> [I > 2σ(I)] | 0.0580      | 0.0388    |
| wR <sub>2</sub> <sup>b</sup> (all data) | 0.1657      | 0.0829    |
| GOF on F <sup>2</sup>                   | 1.074       | 1.025     |

<sup>a</sup>  $R^1 = \sum ||F_o| - |F_c|| / \sum |F_o|$ ; <sup>b</sup>  $wR^2 = [\sum w(F_o^2 - F_c^2)^2 / \sum w(F_o^2)]^{1/2}$ .

**Table S2.** Bond lengths [Å] and angles [°] for complexes **1–2**.

| Complex 1         |            |                   |            |
|-------------------|------------|-------------------|------------|
| Br(1)-Zn(1)       | 2.4135(14) | N(2)-C(8)         | 1.315(12)  |
| Zn(1)-Br(4)       | 2.388(3)   | S(1)-C(15)        | 1.683(11)  |
| S(2)-C(1)         | 1.81(2)    | N(1)-C(7)         | 1.342(12)  |
| Br(2)-Zn(1)-Br(1) | 109.40(6)  | Br(3)-Zn(1)-Br(1) | 111.46(6)  |
| Br(3)-Zn(1)-Br(2) | 106.46(6)  | Br(4)-Zn(1)-Br(3) | 115.47(15) |
| C(15)-S(1)-C(20)  | 92.5(5)    | C(17)-S(2)-C(1)   | 102.1(9)   |
| C(4)-N(1)-C(7)    | 120.0(8)   | C(13)-N(2)-C(18)  | 118.3(8)   |
| Complex 2         |            |                   |            |
| Cd(1)-Cl(1)       | 2.486(3)   | Cd(1)-Cl(2)       | 2.462(3)   |
| Cd(1)-Cl(3)       | 2.479(4)   | S(1)-C(1)         | 1.706(17)  |
| S(2)-C(15)        | 1.689(18)  | N(1)-C(4)         | 1.356(15)  |
| Cl(2)-Cd(1)-Cl(1) | 109.21(11) | Cl(2)-Cd(1)-Cl(3) | 108.62(12) |
| Cl(2)-Cd(1)-Cl(4) | 112.81(16) | Cl(3)-Cd(1)-Cl(4) | 100.93(18) |
| C(11)-S(1)-C(1)   | 96.7(8)    | C(17)-S(2)-C(15)  | 92.0(8)    |
| C(4)-N(1)-C(7)    | 119.1(10)  | C(12)-N(2)-C(16)  | 117.7(11)  |

**Table S3.** Comparison of the Hg<sup>2+</sup> detection properties of complexes with others methods reported in previous literature.

| Methods      | Materials                 | Linear range<br>( $\mu\text{M}$ ) | Detection<br>Limits (nM) | References |
|--------------|---------------------------|-----------------------------------|--------------------------|------------|
| Fluorescence | Ru@UiO-66-NH <sub>2</sub> | 0-200                             | 53                       | [S1]       |
| Fluorescence | CDs-Rho                   | 0-100                             | 2.91                     | [S2]       |
| Fluorescence | AH-COF                    | 0-40                              | 100                      | [S3]       |
| Fluorescence | Eu-Ca-MOF                 | 0.02-200                          | 2.6                      | [S4]       |
| Fluorescence | Probe 1                   | 0-10                              | 21.6                     | [S5]       |
| Fluorescence | Complex 1                 | 0-30                              | 3.11                     | This work  |
| Fluorescence | Complex 2                 | 0-10<br>20-60                     | 2.14                     | This work  |
| Fluorescence | Complex 3                 | 0-20<br>50-300                    | 3.13                     | This work  |

**Table S4.** Determination of Hg<sup>2+</sup> in real water samples by complex 2 (n=3).

| Sample     | Hg <sup>2+</sup> spiked<br>( $\mu\text{M/L}$ ) | Detect Hg <sup>2+</sup><br>( $\mu\text{M/L}$ )<br>Mean $\pm$ SD | Recovery<br>(%) | RSD<br>(%) |
|------------|------------------------------------------------|-----------------------------------------------------------------|-----------------|------------|
| Tap water  | 0                                              | /                                                               | /               | /          |
|            | 2                                              | 1.92                                                            | 95.85           | 0.66       |
|            | 4                                              | 4.04                                                            | 101.10          | 1.49       |
|            | 8                                              | 8.1                                                             | 101.20          | 0.89       |
|            | 16                                             | 16.05                                                           | 100.30          | 1.54       |
| Lake water | 0                                              | /                                                               | /               | /          |

|    |       |        |      |
|----|-------|--------|------|
| 2  | 1.95  | 97.30  | 2.48 |
| 4  | 3.99  | 99.70  | 2.16 |
| 8  | 7.97  | 99.60  | 1.44 |
| 16 | 16.20 | 101.20 | 1.58 |

**Table S5** Determination of Hg<sup>2+</sup> in real water samples by complex **3** (n=3).

| Sample     | Hg <sup>2+</sup> spiked<br>( $\mu\text{M}$ /L) | Detect Hg <sup>2+</sup><br>( $\mu\text{M}$ /L)<br>Mean $\pm$ SD | Recovery<br>(%) | RSD<br>(%) |
|------------|------------------------------------------------|-----------------------------------------------------------------|-----------------|------------|
| Tap water  | 0                                              | /                                                               | /               | /          |
|            | 2                                              | 1.97                                                            | 98.40           | 1.56       |
|            | 4                                              | 4.05                                                            | 101.33          | 2.02       |
|            | 8                                              | 8.03                                                            | 100.33          | 1.21       |
|            | 16                                             | 16.30                                                           | 101.84          | 0.81       |
| Lake water | 0                                              | /                                                               | /               | /          |
|            | 2                                              | 2.01                                                            | 100.30          | 2.14       |
|            | 4                                              | 4.03                                                            | 100.63          | 1.98       |
|            | 8                                              | 7.98                                                            | 99.80           | 1.84       |
|            | 16                                             | 15.90                                                           | 99.40           | 1.11       |

#### References:

[S1]P. Jia, K.R. Yang, J.J. Hou, Y.Y. Cao, X. Wang and L. Wang, J Hazard. Mater.,



2020, **408**, 124469.

[S2]M. Li, X.N. Li, M.W. Xu, B.W. Liu, M.Q. Yang, Z.J. Chen, T.C. Gao, T.D.

James, L.D. Wang and H.B. Xiao, Chem. Eng. J., 2021, 426, 131296.

[S3]Y.X. Yu, G.L. Lia, J.H. Liu and D.Q. Yuan, Chem. Eng. J., 2020, 401, 126139.

[S4]N.W.H. Guo, I.P. Peng, Y. Chen, Y.S. Liu, C.L. Li, H. Zhang and W. Yang,

Talanta, 2022, 250, 123710.

[S5]X.M. Wu, Y.N. Li, S.X. Yang, H.Y. Tian and B.G. Sun, Microchem., 2020, 157,

105024.
